# Supplementary material
Source: HighWire-hosted journal article supplement (http://rc.rcjournal.com/highwire/filestream/11920/field_highwire_adjunct_files/0/RC2471_DePew_Suppl.pdf)
Supplement: RC2471_DePew_Suppl.pdf [file RC2471_DePew_Suppl.pdf]

Participant \_\_\_\_\_

Date \_\_\_\_\_

Please indicate below how confident you are that you can successfully walk the following distances within 6 minutes by circling the number corresponding to your confidence for each distance.

**I BELIEVE THAT WITHIN SIX MINUTES I CAN WALK:**

1. ONE HALF OF A FOOTBALL FIELD OR CITY BLOCK (55 meters)

|                         |                        |                       |                         |                     |
|-------------------------|------------------------|-----------------------|-------------------------|---------------------|
| 1                       | 2                      | 3                     | 4                       | 5                   |
| Not at all<br>confident | Minimally<br>Confident | Somewhat<br>Confident | Moderately<br>Confident | Highly<br>Confident |

2. ONE FULL FOOTBALL FIELD OR CITY BLOCK (110 meters)

|                         |                        |                       |                         |                     |
|-------------------------|------------------------|-----------------------|-------------------------|---------------------|
| 1                       | 2                      | 3                     | 4                       | 5                   |
| Not at all<br>confident | Minimally<br>Confident | Somewhat<br>Confident | Moderately<br>Confident | Highly<br>Confident |

3. ONE AND A HALF FOOTBALL FIELDS OR CITY BLOCKS (165 meters)

|                         |                        |                       |                         |                     |
|-------------------------|------------------------|-----------------------|-------------------------|---------------------|
| 1                       | 2                      | 3                     | 4                       | 5                   |
| Not at all<br>confident | Minimally<br>Confident | Somewhat<br>Confident | Moderately<br>Confident | Highly<br>Confident |

4. TWO FOOTBALL FIELDS OR CITY BLOCKS (220 meters)

|                         |                        |                       |                         |                     |
|-------------------------|------------------------|-----------------------|-------------------------|---------------------|
| 1                       | 2                      | 3                     | 4                       | 5                   |
| Not at all<br>confident | Minimally<br>Confident | Somewhat<br>Confident | Moderately<br>Confident | Highly<br>Confident |

5. THREE FOOTBALL FIELDS OR CITY BLOCKS (330 meters)

|                         |                        |                       |                         |                     |
|-------------------------|------------------------|-----------------------|-------------------------|---------------------|
| 1                       | 2                      | 3                     | 4                       | 5                   |
| Not at all<br>confident | Minimally<br>Confident | Somewhat<br>Confident | Moderately<br>Confident | Highly<br>Confident |

6. ONE QUARTER MILE (402 meters)

|                         |                        |                       |                         |                     |
|-------------------------|------------------------|-----------------------|-------------------------|---------------------|
| 1                       | 2                      | 3                     | 4                       | 5                   |
| Not at all<br>confident | Minimally<br>Confident | Somewhat<br>Confident | Moderately<br>Confident | Highly<br>Confident |

7. ONE HALF MILE (805 meters)

|                         |                        |                       |                         |                     |
|-------------------------|------------------------|-----------------------|-------------------------|---------------------|
| 1                       | 2                      | 3                     | 4                       | 5                   |
| Not at all<br>confident | Minimally<br>Confident | Somewhat<br>Confident | Moderately<br>Confident | Highly<br>Confident |

IRB# 11-008157

Participant: \_\_\_\_\_

Date: \_\_\_\_\_

Please rate your confidence for each question below by circling the number corresponding to your level of confidence.

1) How confident are you that you are physically active every day?

(examples: washing dishes, dusting the house, vacuuming, grocery shopping, doing laundry, gardening, walking a pet, golfing, bowling, dancing, etc.)

|                         |                        |                       |                         |                     |
|-------------------------|------------------------|-----------------------|-------------------------|---------------------|
| 1                       | 2                      | 3                     | 4                       | 5                   |
| Not at all<br>confident | Minimally<br>Confident | Somewhat<br>Confident | Moderately<br>Confident | Highly<br>Confident |

2) How confident are you that you are physically active even when your day doesn't go the way you wanted or expected?

|                         |                        |                       |                         |                     |
|-------------------------|------------------------|-----------------------|-------------------------|---------------------|
| 1                       | 2                      | 3                     | 4                       | 5                   |
| Not at all<br>confident | Minimally<br>Confident | Somewhat<br>Confident | Moderately<br>Confident | Highly<br>Confident |

3) How confident are you that you are physically active even when you feel tired or fatigued?

|                         |                        |                       |                         |                     |
|-------------------------|------------------------|-----------------------|-------------------------|---------------------|
| 1                       | 2                      | 3                     | 4                       | 5                   |
| Not at all<br>confident | Minimally<br>Confident | Somewhat<br>Confident | Moderately<br>Confident | Highly<br>Confident |

4) How confident are you that you are physically active even when you are in mild pain or have mild respiratory discomfort?

|                         |                        |                       |                         |                     |
|-------------------------|------------------------|-----------------------|-------------------------|---------------------|
| 1                       | 2                      | 3                     | 4                       | 5                   |
| Not at all<br>confident | Minimally<br>Confident | Somewhat<br>Confident | Moderately<br>Confident | Highly<br>Confident |

5) How confident are you that you are physically active even when you feel depressed, worried, or stressed out?

|                         |                        |                       |                         |                     |
|-------------------------|------------------------|-----------------------|-------------------------|---------------------|
| 1                       | 2                      | 3                     | 4                       | 5                   |
| Not at all<br>confident | Minimally<br>Confident | Somewhat<br>Confident | Moderately<br>Confident | Highly<br>Confident |



# Linear Analogue Self-Assessment Well-being Survey

ONLINE DATA SUPPLEMENT

Participant: \_\_\_\_\_ Date: \_\_\_\_\_

---

Directions: Please circle the number (0-10) best reflecting your response to the following questions that describes your feelings **during the past week, including today**.

How would you describe:

**1. Your overall Quality of Life?**

|           |   |   |   |   |   |   |   |   |   |            |
|-----------|---|---|---|---|---|---|---|---|---|------------|
| 0         | 1 | 2 | 3 | 4 | 5 | 6 | 7 | 8 | 9 | 10         |
| As bad as |   |   |   |   |   |   |   |   |   | As good as |
| it can be |   |   |   |   |   |   |   |   |   | it can be  |

**2. Your overall mental (intellectual) well being?**

|           |   |   |   |   |   |   |   |   |   |            |
|-----------|---|---|---|---|---|---|---|---|---|------------|
| 0         | 1 | 2 | 3 | 4 | 5 | 6 | 7 | 8 | 9 | 10         |
| As bad as |   |   |   |   |   |   |   |   |   | As good as |
| it can be |   |   |   |   |   |   |   |   |   | it can be  |

**3. Your overall physical well being?**

|           |   |   |   |   |   |   |   |   |   |            |
|-----------|---|---|---|---|---|---|---|---|---|------------|
| 0         | 1 | 2 | 3 | 4 | 5 | 6 | 7 | 8 | 9 | 10         |
| As bad as |   |   |   |   |   |   |   |   |   | As good as |
| it can be |   |   |   |   |   |   |   |   |   | it can be  |

**4. Your overall emotional well being?**

|           |   |   |   |   |   |   |   |   |   |            |
|-----------|---|---|---|---|---|---|---|---|---|------------|
| 0         | 1 | 2 | 3 | 4 | 5 | 6 | 7 | 8 | 9 | 10         |
| As bad as |   |   |   |   |   |   |   |   |   | As good as |
| it can be |   |   |   |   |   |   |   |   |   | it can be  |

**5. Your level of social activity?**

|           |   |   |   |   |   |   |   |   |   |            |
|-----------|---|---|---|---|---|---|---|---|---|------------|
| 0         | 1 | 2 | 3 | 4 | 5 | 6 | 7 | 8 | 9 | 10         |
| As bad as |   |   |   |   |   |   |   |   |   | As good as |
| it can be |   |   |   |   |   |   |   |   |   | it can be  |

**6. Your overall spiritual well being?**

|           |   |   |   |   |   |   |   |   |   |            |
|-----------|---|---|---|---|---|---|---|---|---|------------|
| 0         | 1 | 2 | 3 | 4 | 5 | 6 | 7 | 8 | 9 | 10         |
| As bad as |   |   |   |   |   |   |   |   |   | As good as |
| it can be |   |   |   |   |   |   |   |   |   | it can be  |
